# Supplementary material for: Fresh Pork as Protein Source in the USDA Thrifty Food Plan 2021: A Modeling Analysis of Lowest-Cost Healthy Diets
Source: MDPI journal article supplement (doi:10.3390/nu15081897), 2023-04-14
Supplement: s1 [file s1]

Supplemental Table S2 : Total cost and detailed cost by ‘as-consumed’ Market Basket category for protein foods in Models 1-5 by food group and age-gender group.

| Age   | Food group       | FEMALE  |         |         |         |         | MALE    |         |         |         |         |
|-------|------------------|---------|---------|---------|---------|---------|---------|---------|---------|---------|---------|
|       |                  | Model 1 | Model 2 | Model 3 | Model 4 | Model 5 | Model 1 | Model 2 | Model 3 | Model 4 | Model 5 |
| 4-13  | Protein foods    | 10.3    | 9.76    | 10.4    | 10.39   | 16.93   | 10.58   | 10.09   | 10.78   | 10.78   | 17.8    |
|       | Beef             | 2.05    | 0       | 0       | 0       | 12.75   | 1.78    | 0       | 0       | 0       | 13.36   |
|       | Pork             |         | 1.57    | 2.15    | 6.07    | 0       |         | 1.37    | 2.38    | 6.36    | 0       |
|       | Cured meat       | 0       | 0       | 0       | 0       | 0       | 0       | 0       | 0       | 0       | 0       |
|       | Poultry          | 3.73    | 3.69    | 3.74    | 0       | 0       | 4.16    | 4.11    | 3.8     | 0       | 0       |
|       | Eggs             | 0.64    | 0.62    | 0.63    | 0.44    | 0.21    | 0.63    | 0.61    | 0.61    | 0.42    | 0.23    |
|       | Seafood          | 3.06    | 3.06    | 3.06    | 3.06    | 3.06    | 3.17    | 3.17    | 3.17    | 3.17    | 3.17    |
|       | Nuts, seeds, soy | 0.82    | 0.82    | 0.82    | 0.82    | 0.91    | 0.84    | 0.83    | 0.82    | 0.83    | 1.04    |
|       | All categories   | 40.25   | 40.25   | 39.69   | 39.83   | 47.11   | 42.07   | 42.07   | 41.58   | 41.72   | 49.49   |
| 14-19 | Protein foods    | 12.17   | 11.44   | 11.95   | 12.02   | 19.96   | 15.04   | 14.47   | 18.01   | 17.69   | 31.45   |
|       | Beef             | 3.44    | 0       | 0       | 0       | 15.71   | 2.42    | 0       | 0       | 0       | 26.45   |
|       | Pork             |         | 2.64    | 3.54    | 7.48    | 0       |         | 1.89    | 7.26    | 12.59   | 0       |
|       | Cured meat       | 0       | 0       | 0       | 0       | 0       | 0       | 0       | 0       | 0       | 0       |
|       | Poultry          | 4.01    | 4       | 3.76    | 0       | 0       | 6.73    | 6.68    | 5.09    | 0       | 0       |
|       | Eggs             | 0.45    | 0.54    | 0.38    | 0.28    | 0.24    | 0.79    | 0.8     | 0.56    | 0.26    | 0.19    |
|       | Seafood          | 3.3     | 3.3     | 3.3     | 3.3     | 3.3     | 3.85    | 3.85    | 3.85    | 3.85    | 3.85    |
|       | Nuts, seeds, soy | 0.97    | 0.96    | 0.97    | 0.96    | 0.71    | 1.25    | 1.25    | 1.25    | 0.99    | 0.96    |
|       | All categories   | 48.72   | 48.72   | 47.88   | 48.37   | 60.62   | 61.46   | 61.46   | 60.62   | 60.62   | 78.19   |
| 20-50 | Protein foods    | 12.4    | 11.87   | 12      | 12      | 19.71   | 14.85   | 14.96   | 14.24   | 14.36   | 23.29   |
|       | Beef             | 1.95    | 0       | 0       | 0       | 13.66   | 3.22    | 0       | 0       | 0       | 16.34   |
|       | Pork             |         | 1.49    | 1.58    | 6.5     | 0       |         | 2.47    | 5.37    | 7.78    | 0       |
|       | Cured meat       | 0       | 0       | 0       | 0       | 0       | 0       | 0       | 0       | 0       | 0       |
|       | Poultry          | 4.7     | 4.65    | 4.7     | 0       | 0       | 4.68    | 5.81    | 2.3     | 0       | 0       |
|       | Eggs             | 0.99    | 0.97    | 0.96    | 0.75    | 1.03    | 1.17    | 1.08    | 0.97    | 0.89    | 1.19    |

[illegible]
