# Supplementary material for: Fresh Pork as Protein Source in the USDA Thrifty Food Plan 2021: A Modeling Analysis of Lowest-Cost Healthy Diets
Source: MDPI journal article supplement (doi:10.3390/nu15081897), 2023-04-14
Supplement: s1 [file s1]

Supplemental Table S1: Categorization of Market Basket, combined, TFP and modeling categories

| Market basket category          | Combined category (n=46)        | Initial category <sup>1</sup> (n=67)                                               | Modeling category (n=99)               |
|---------------------------------|---------------------------------|------------------------------------------------------------------------------------|----------------------------------------|
| Vegetables                      |                                 |                                                                                    |                                        |
| Dark green vegetables           | Dark green vegetables           | Dark green vegetables                                                              | Dark green vegetables, HC <sup>2</sup> |
|                                 |                                 |                                                                                    | Dark green vegetables, LC <sup>3</sup> |
| Red and orange vegetables       | Red & orange vegetables         | Red & orange vegetables                                                            | Red & orange vegetables, HC            |
|                                 |                                 |                                                                                    | Red & orange vegetables, LC            |
| Beans, peas, lentils            | Beans, peas, lentils            | Beans, peas, lentils                                                               | Beans, peas, lentils                   |
|                                 |                                 |                                                                                    |                                        |
| Starchy vegetables              | Starchy vegetables              | Starchy vegetables                                                                 | Starchy vegetables, HC                 |
|                                 | Fried Potato Products           | Fried Potato Products                                                              | Starchy vegetables, LC                 |
|                                 |                                 |                                                                                    | Fried Potato Products                  |
| Other vegetables                | Other vegetables                | Other vegetables                                                                   | Other vegetables, HC                   |
|                                 |                                 |                                                                                    | Other vegetables, LC                   |
| Fruits                          |                                 |                                                                                    |                                        |
| Whole fruit                     | Fruit                           | Fruit, HND <sup>4</sup> (0 g added sugars/100 g and/or <0.5 g saturated fat/100 g) | Fruit, HND, HC                         |
|                                 |                                 |                                                                                    | Fruit, HND, LC                         |
|                                 |                                 | Fruit, LND <sup>5</sup>                                                            | Fruit, LND, HC                         |
|                                 |                                 |                                                                                    | Fruit, LND, LC                         |
| 100% fruit juice                | 100% juice                      | 100% juice                                                                         | 100% juice, HC                         |
|                                 |                                 |                                                                                    | 100% juice, LC                         |
| Grains                          |                                 |                                                                                    |                                        |
| Whole grains, staple grains     | Staple grains                   | Staple grains, HND (≥50% whole grains)                                             | Staple grains, HND, HC                 |
|                                 |                                 |                                                                                    | Staple grains, HND, LC                 |
| Refined grains , staples grains |                                 | Staple grains, LZD                                                                 | Staple grains, LND, HC                 |
|                                 |                                 |                                                                                    | Staple grains, LND, LC                 |
|                                 | Biscuits, muffins, quick breads | Biscuits, muffins, quick breads                                                    | Biscuits, muffins, quick breads        |
| Whole grains, staple grains     | Popcorn                         | Popcorn, HND (0 g added sugars/100 g and <7 g saturated fat/100 g)                 | Popcorn, HND                           |
|                                 |                                 | Popcorn, LND                                                                       | Popcorn, LND                           |

|                                                        |                             |                                                                                                                                                               |                             |
|--------------------------------------------------------|-----------------------------|---------------------------------------------------------------------------------------------------------------------------------------------------------------|-----------------------------|
| Whole grains, cereals                                  | Cereals                     | Cereals, HND (≤21.2 g total sugars/100 g and ≥50% whole grains)                                                                                               | Cereals, HND                |
| Refined grains, cereals                                |                             | Cereals, LND                                                                                                                                                  | Cereals, LND                |
| Refined grain other                                    | Tortilla, corn, other chips | Tortilla, corn, other chips                                                                                                                                   | Tortilla, corn, other chips |
|                                                        | Crackers                    | Crackers, HND (≥50% whole grains)                                                                                                                             | Crackers, HND               |
|                                                        |                             | Crackers, LND                                                                                                                                                 | Crackers, LND               |
|                                                        | Pretzels/snack mix          | Pretzels/snack mix                                                                                                                                            | Pretzels/snack mix          |
| Dairy                                                  |                             |                                                                                                                                                               |                             |
| Higher nutrient density milk, yogurt, soy alternatives | Milk and Yogurt             | Milk and Yogurt, HND (plain/flavored nonfat/1% milk, milk and non-whole milk yogurt with 0 g added sugars/100 g, soy beverage with <3.3 g added sugars/100 g) | Milk and Yogurt, HND        |
| Lower nutrient density milk, yogurt, soy alternatives  |                             | Milk and Yogurt, LND                                                                                                                                          | Milk and Yogurt, LND        |
| Cheese                                                 | Cheese                      | Cheese                                                                                                                                                        | Cheese, HC                  |
|                                                        |                             |                                                                                                                                                               | Cheese, LC                  |
| Protein foods                                          |                             |                                                                                                                                                               |                             |
| Pork                                                   | Pork                        | Pork, HND (≤4.5 g saturated fat/100 g and 0 g added sugars/100 g)                                                                                             | Pork, HND, HC               |
|                                                        |                             |                                                                                                                                                               | Pork, HND, LC               |
|                                                        |                             | Pork, LND                                                                                                                                                     | Pork, LND, HC               |
|                                                        |                             |                                                                                                                                                               | Pork, LND, LC               |
| Beef                                                   | Beef                        | Beef, HND (≤4.5 g saturated fat/100 g and 0 g added sugars/100 g)                                                                                             | Beef, HND, HC               |
|                                                        |                             |                                                                                                                                                               | Beef, HND, LC               |
|                                                        |                             | Beef, LND                                                                                                                                                     | Beef, LND, HC               |
|                                                        |                             |                                                                                                                                                               | Beef, LND, LC               |
| Cured meat                                             | Cured meat                  | Cured meat                                                                                                                                                    | Cured meat                  |
| Poultry                                                | Poultry                     | Poultry, HND (≤4.5 g saturated fat/100 g and 0 g added sugars/100 g)                                                                                          | Poultry, HND, HC            |
|                                                        |                             |                                                                                                                                                               | Poultry, HND, LC            |
|                                                        |                             | Poultry, LND                                                                                                                                                  | Poultry, LND, HC            |
|                                                        |                             |                                                                                                                                                               | Poultry, LND, LC            |
| Eggs                                                   | Eggs                        | Eggs                                                                                                                                                          | Eggs                        |
|                                                        | Mixed Dishes - Eggs         | Mixed Dishes – Eggs, HND (< median sodium                                                                                                                     | Mixed Dishes – Eggs, HND    |

|                                |                                       |                                                                                             |                                                |
|--------------------------------|---------------------------------------|---------------------------------------------------------------------------------------------|------------------------------------------------|
|                                |                                       | content/100 g in WWEIA category)                                                            |                                                |
|                                |                                       | Mixed Dishes – Eggs, LND                                                                    | Mixed Dishes – Eggs, LND                       |
| Seafood                        | Seafood                               | Seafood                                                                                     | Seafood, HC<br>Seafood, LC                     |
| Nuts, seeds, soy products      | Nut & seed butters                    | Nut & seed butters                                                                          | Nut & seed butters                             |
|                                | Nuts & Seeds                          | Nuts & Seeds, HND (0 g added sugars/100 g)                                                  | Nuts & Seeds, HND                              |
|                                |                                       | Nuts & Seeds, LND                                                                           | Nuts & Seeds, LND                              |
|                                | Processed soy products                | Processed soy products                                                                      | Processed soy products                         |
| Miscellaneous                  |                                       |                                                                                             |                                                |
| Ready-to-eat and ready-to-heat | Mixed Dishes - Beans, peas, lentils   | Mixed Dishes- Beans, peas, lentils, HND (< median sodium content/100 g in WWEIA category)   | Mixed Dishes - Beans, peas, lentils, HND, HC   |
|                                |                                       |                                                                                             | Mixed Dishes - Beans, peas, lentils, HND, LC   |
|                                |                                       | Mixed Dishes - Beans, peas, lentils, LND                                                    | Mixed Dishes - Beans, peas, lentils, LND, HC   |
|                                |                                       |                                                                                             | Mixed Dishes - Beans, peas, lentils, LND, LC   |
|                                | Mixed Dishes - Grain based            | Mixed Dishes- Grain based, HND (< median sodium content/100 g in WWEIA category)            | Mixed Dishes - Grain based, HND, HC            |
|                                |                                       |                                                                                             | Mixed Dishes - Grain based, HND, LC            |
|                                |                                       | Mixed Dishes - Grain based, LND                                                             | Mixed Dishes - Grain based, LND, HC            |
|                                |                                       |                                                                                             | Mixed Dishes - Grain based, LND, LC            |
|                                | Mixed Dishes - Meat, Poultry, Seafood | Mixed Dishes- Meat, Poultry, Seafood, HND (< median sodium content/100 g in WWEIA category) | Mixed Dishes - Meat, Poultry, Seafood, HND, HC |
|                                |                                       |                                                                                             | Mixed Dishes - Meat, Poultry, Seafood, HND, LC |
|                                |                                       | Mixed Dishes - Meat, Poultry, Seafood, LND                                                  | Mixed Dishes - Meat, Poultry, Seafood, LND, HC |
|                                |                                       |                                                                                             | Mixed Dishes - Meat, Poultry, Seafood, LND, LC |
|                                | Pizza                                 | Pizza, HND (< median sodium content/100 g in WWEIA category)                                | Pizza, HND, HC                                 |
|                                |                                       |                                                                                             | Pizza, HND, LC                                 |
|                                |                                       | Pizza, LND                                                                                  | Pizza, LND, HC                                 |
|                                |                                       |                                                                                             | Pizza, LND, LC                                 |

|                                                 |                                           |                                                                                 |                                                        |
|-------------------------------------------------|-------------------------------------------|---------------------------------------------------------------------------------|--------------------------------------------------------|
|                                                 | Mixed Dishes - Sandwiches                 | Mixed Dishes- Sandwiches, HND (< median sodium content/100 g in WWEIA category) | Mixed Dishes - Sandwiches, HND, HC                     |
|                                                 |                                           |                                                                                 | Mixed Dishes - Sandwiches, HND, LC                     |
|                                                 |                                           | Mixed Dishes - Sandwiches, LND                                                  | Mixed Dishes - Sandwiches, LND, HC                     |
|                                                 |                                           |                                                                                 | Mixed Dishes - Sandwiches, LND, LC                     |
|                                                 | Mixed Dishes - Vegetables                 | Mixed Dishes- Vegetables, HND (< median sodium content/100 g in WWEIA category) | Mixed Dishes - Vegetables, HND, HC                     |
|                                                 |                                           |                                                                                 | Mixed Dishes - Vegetables, HND, LC                     |
|                                                 |                                           | Mixed Dishes - Vegetables, LND                                                  | Mixed Dishes - Vegetables, LND, HC                     |
|                                                 |                                           |                                                                                 | Mixed Dishes - Vegetables, LND, LC                     |
|                                                 | Soups                                     | Soups, HND (< median sodium content/100 g in WWEIA category)                    | Soups, HND, HC                                         |
|                                                 |                                           |                                                                                 | Soups, HND, LC                                         |
|                                                 |                                           | Soups, LND                                                                      | Soups, LND, HC                                         |
|                                                 |                                           |                                                                                 | Soups, LND, LC                                         |
| Coffee & Tea                                    | Coffee & Tea                              | Coffee & Tea, HND (0 g added sugars/100 g)                                      | Coffee & Tea, HND                                      |
|                                                 |                                           | Coffee & Tea, LND                                                               | Coffee & Tea, LND                                      |
| Table fat and oils                              | Butter and animal fats                    | Butter and animal fats                                                          | Butter and animal fats                                 |
|                                                 | Margarine, oils, cream, cream substitutes | Margarine, oils, cream, cream substitutes                                       | Margarine, oils, cream, cream substitutes              |
| Sauces, condiments, jams, honey, sugars, spices | Condiments and Sauces                     | Condiments and Sauces                                                           | Condiments and Sauces, HC                              |
|                                                 |                                           |                                                                                 | Condiments and Sauces, LC                              |
|                                                 | Sugar and sugar substitutes               | Sugar and sugar substitutes                                                     | Sugar and sugar substitutes                            |
| Other Miscellaneous Foods and Beverages         | Sodas                                     | Diet beverages                                                                  | Diet beverages                                         |
|                                                 |                                           | Soft drinks                                                                     | Soft drinks                                            |
|                                                 | Fruit drinks                              | Fruit drinks, HND (0 g added sugars/100 g)                                      | Fruit drinks, HND                                      |
|                                                 |                                           | Fruit drinks, LND                                                               | Fruit drinks, LND                                      |
|                                                 | Milk substitutes, nutritional             | Milk substitutes, nutritional beverages, and smoothies                          | Milk substitutes, nutritional beverages, and smoothies |

|  |                          |                       |                       |
|--|--------------------------|-----------------------|-----------------------|
|  | beverages, and smoothies |                       |                       |
|  | Sweet bakery products    | Sweet bakery products | Sweet bakery products |
|  | Snack Bars               | Snack Bars            | Snack Bars            |
|  | Candy                    | Candy                 | Candy                 |
|  | Other Desserts           | Other Desserts        | Other Desserts        |

<sup>1</sup>Inclusion criteria for higher nutrient density category detailed in brackets.<sup>2</sup>HC: Hight Cost. <sup>3</sup>LC : Low cost. <sup>4</sup>HND : Hight nutrient density. <sup>5</sup>LND : Low nutrient density.
